# Supplementary figures and images for: Three-dimensional epitaxy of single crystalline semiconductors by polarity-selective multistage growth
Source: Royal Society of Chemistry journal article supplement (doi:10.1039/c6ce01897a), 2016-01-01

a

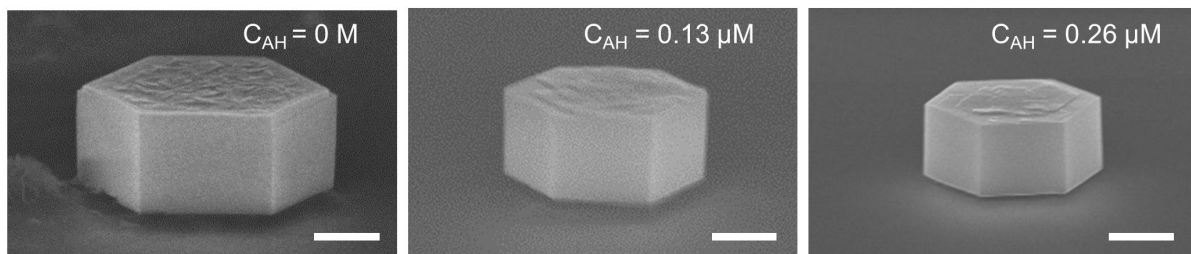

b

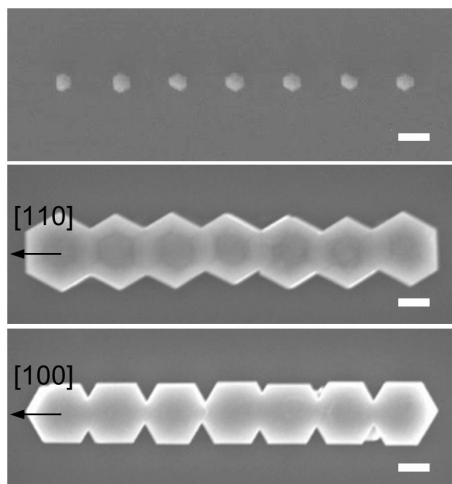

c

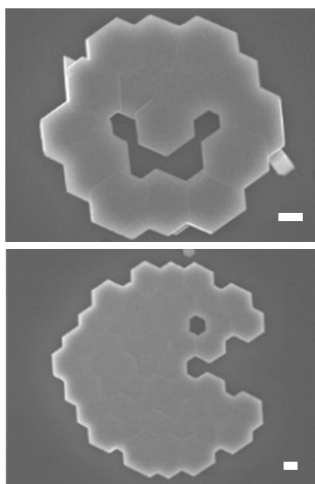

d

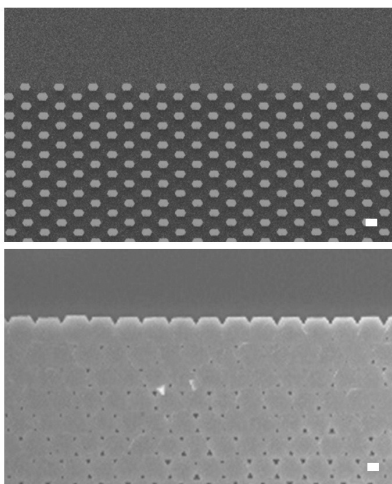

Supplement: c6ce01897a2.pdf [file c6ce01897a2.pdf]

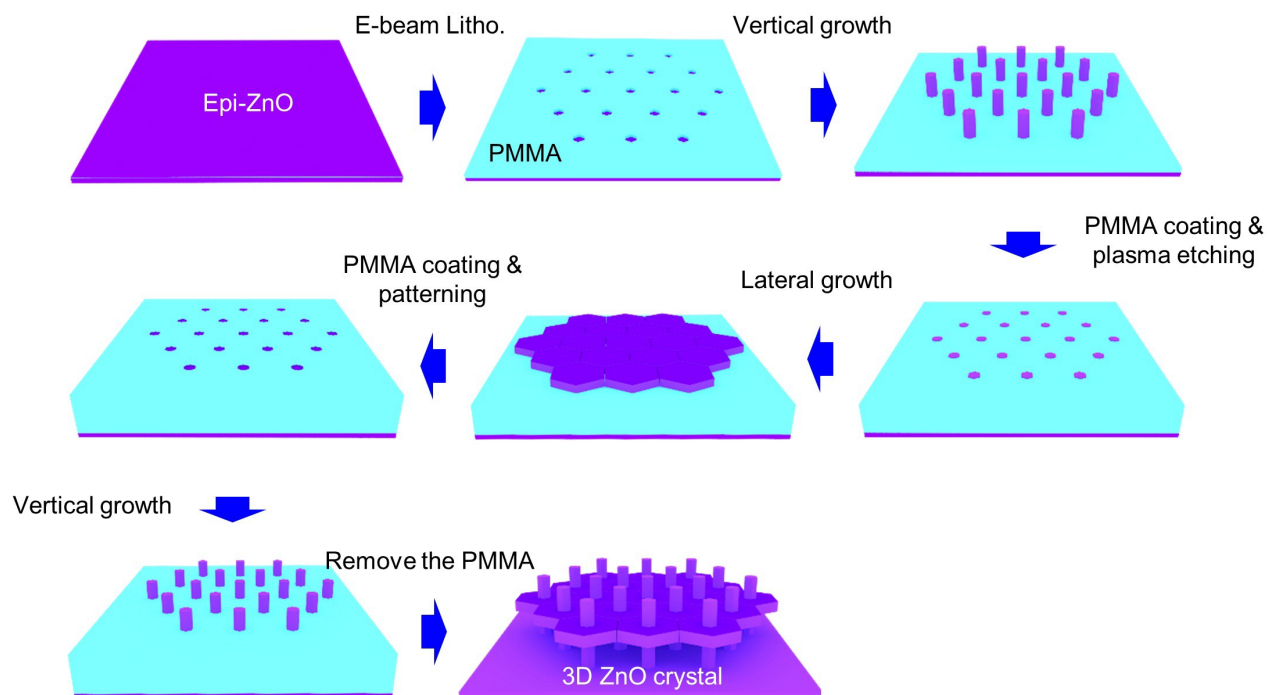

Supplement: c6ce01897a3.pdf [file c6ce01897a3.pdf]

a

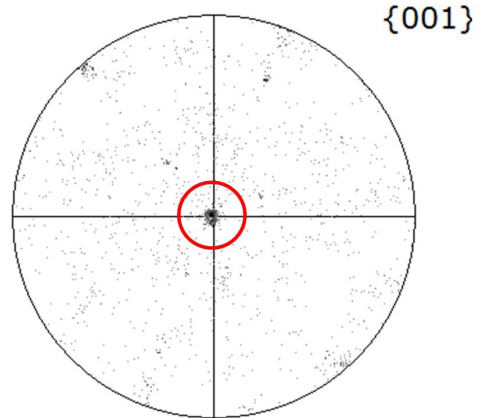

b

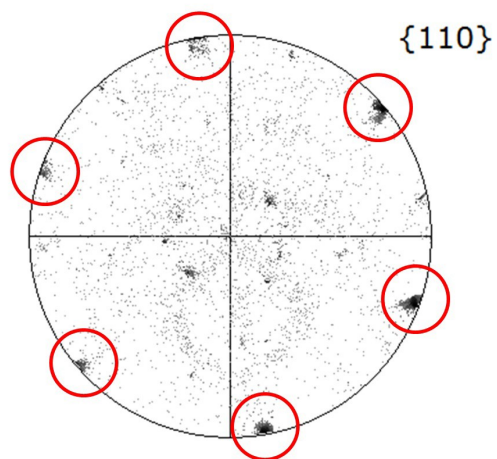

Supplement: c6ce01897a4.pdf [file c6ce01897a4.pdf]

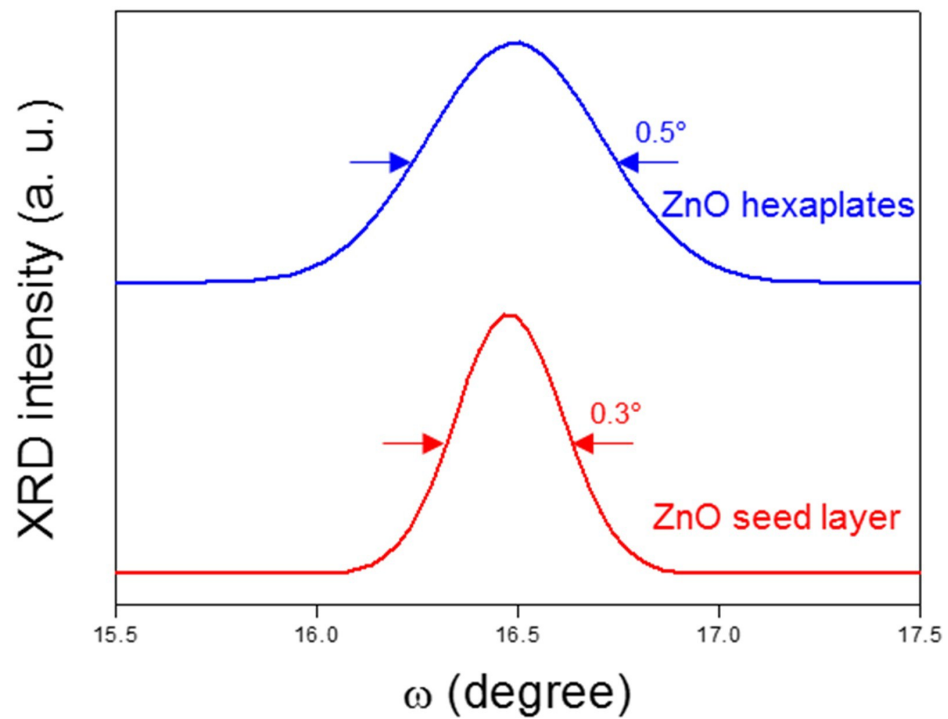

Supplement: c6ce01897a5.pdf [file c6ce01897a5.pdf]

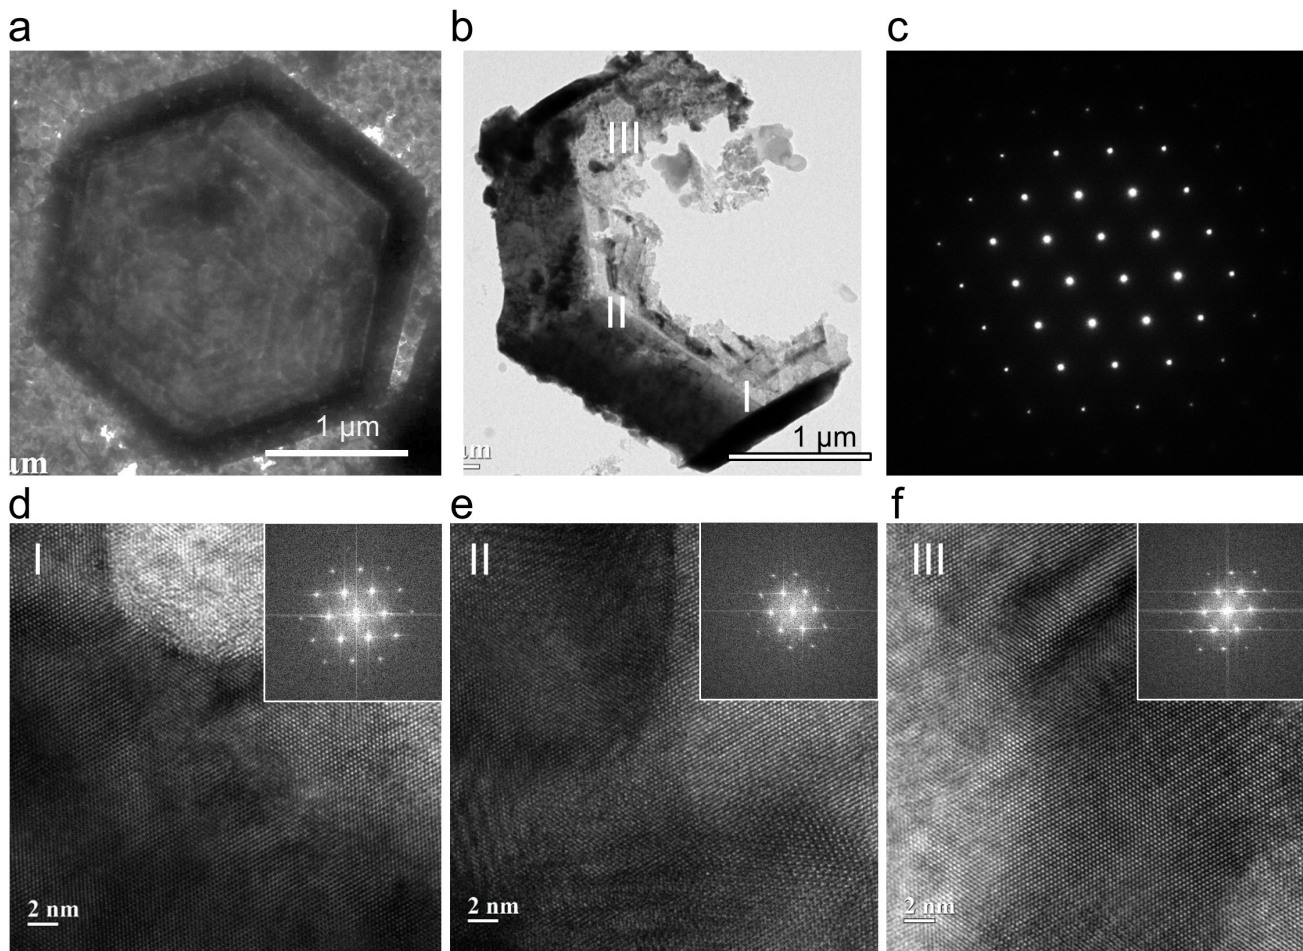

Supplement: c6ce01897a6.pdf [file c6ce01897a6.pdf]
